# Supplementary material for: Twins in polyhedral 26-facet Cu7S4 cages: Synthesis, characterization and their enhancing photochemical activities
Source: Royal Society of Chemistry journal article supplement (doi:10.1039/c2dt12091g), 2012-01-01
Supplement: c2dt12091g.pdf [file c2dt12091g.pdf]

## Electronic Supplementary Information

# Twins in polyhedral 26-facet $\text{Cu}_7\text{S}_4$ cages: Synthesis, characterization and their enhancing photochemical activities

Shaodong Sun, Dongchu Deng, Chuncai Kong, Xiaoping Song and Zhimao Yang\*

*School of Science, MOE Key Laboratory for Non-Equilibrium Synthesis and Modulation of Condensed Matter,*

*State Key Laboratory for Mechanical Behavior of Materials, Xi'an Jiaotong University, Xi'an 710049, ShaanXi,*

*People's Republic of China*

\* Corresponding author. E-mail: zmyang@mail.xjtu.edu.cn

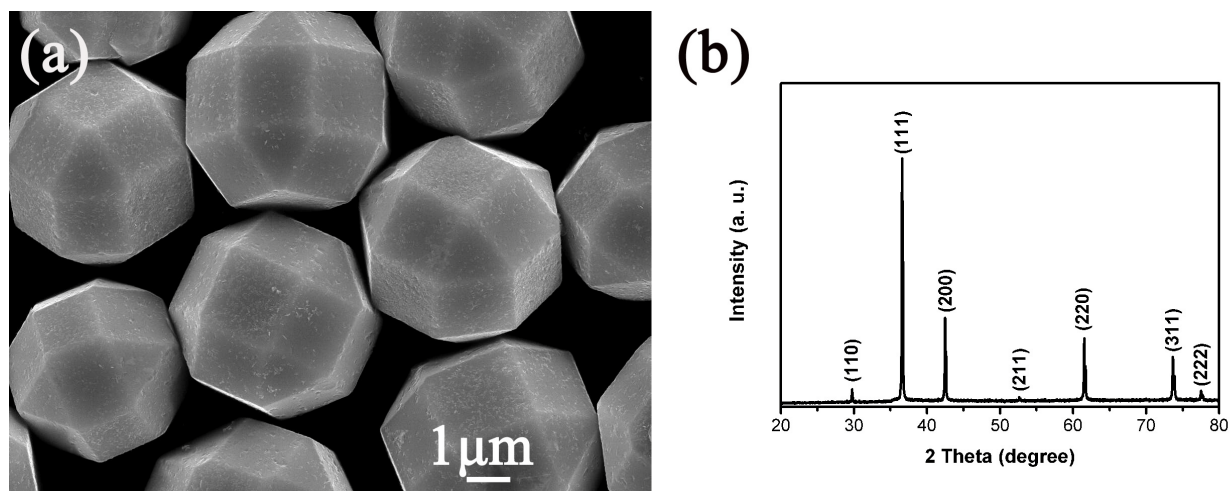

**Fig. S1.** (a) FESEM image of the polyhedral 26-facet  $\text{Cu}_2\text{O}$  templates; (b) the corresponding XRD pattern.

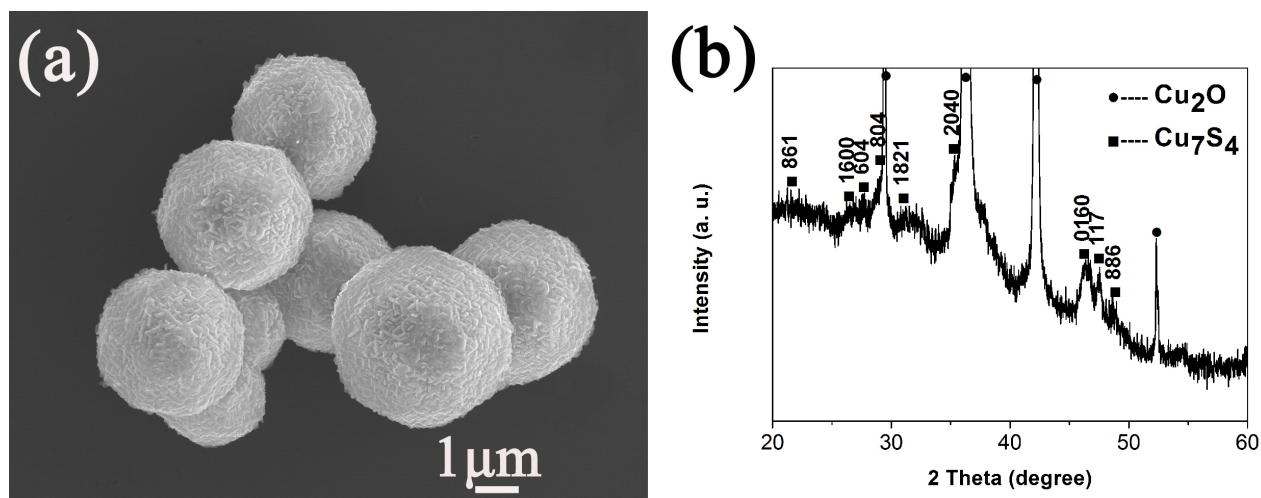

**Fig. S2.** (a) FESEM image of the polyhedral 26-facet Cu<sub>2</sub>O@Cu<sub>7</sub>S<sub>4</sub> core/shell architectures obtained in anhydrous ethanol reaction system; (b) the corresponding XRD pattern.

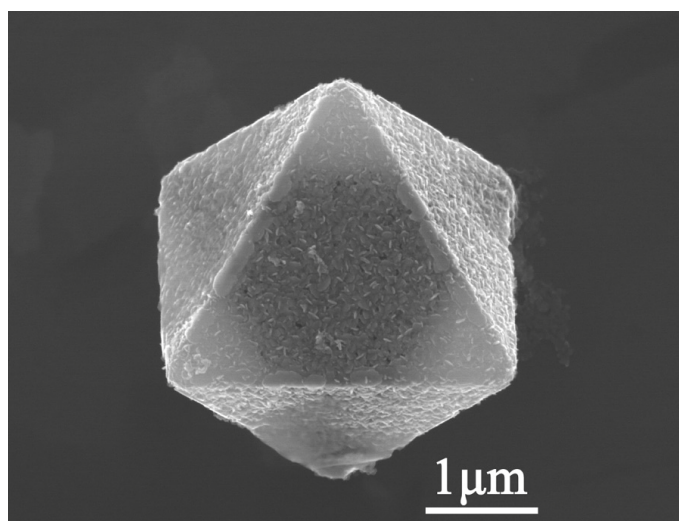

**Fig.S3.** FESEM image of the copper sulfide octahedral microcage with nanoplates building blocks.

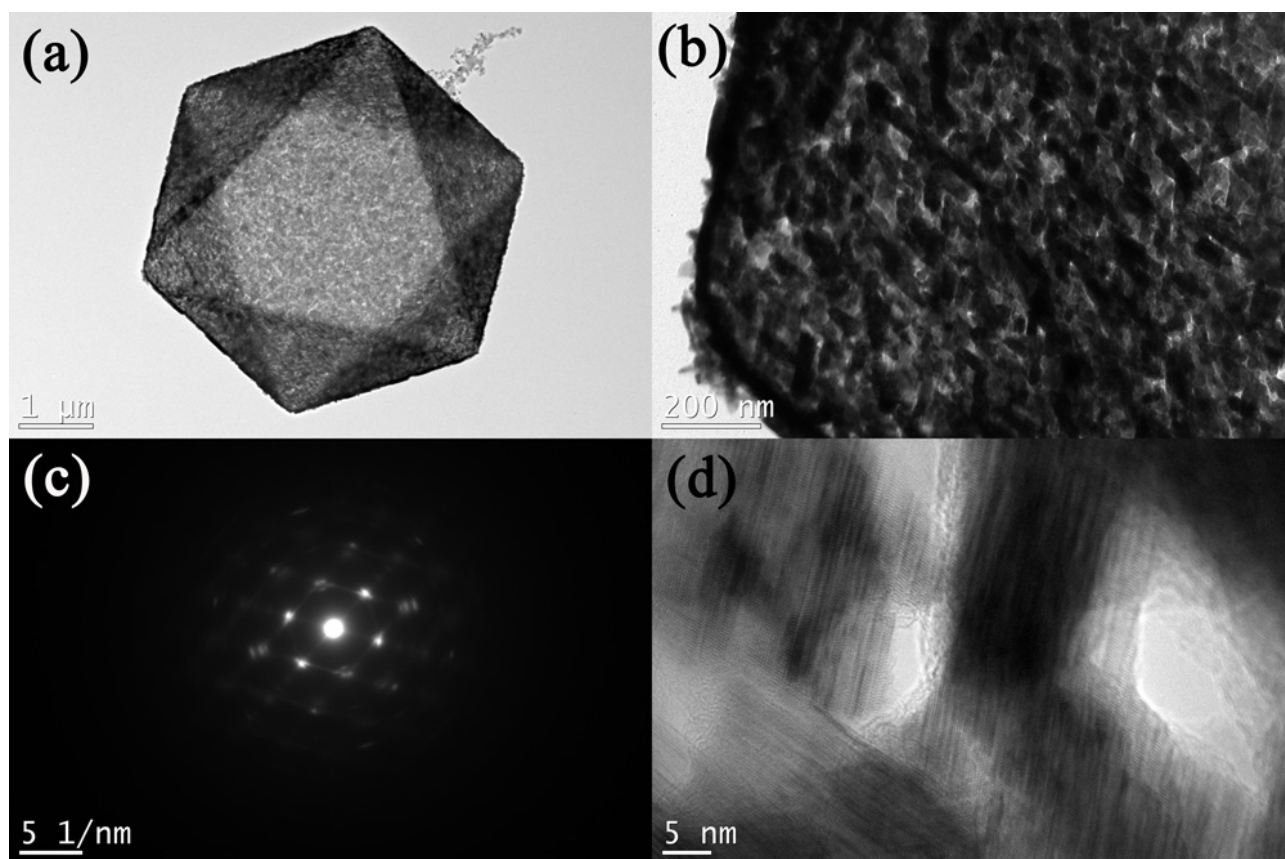

**Fig. S4.** (a) TEM image of an octahedral microcage; (b) High-magnification TEM image of the octahedral microcage; (c) SAED pattern of the octahedral microcage; (d) HRTEM image of the nanotwinned structures of the octahedral microcage.

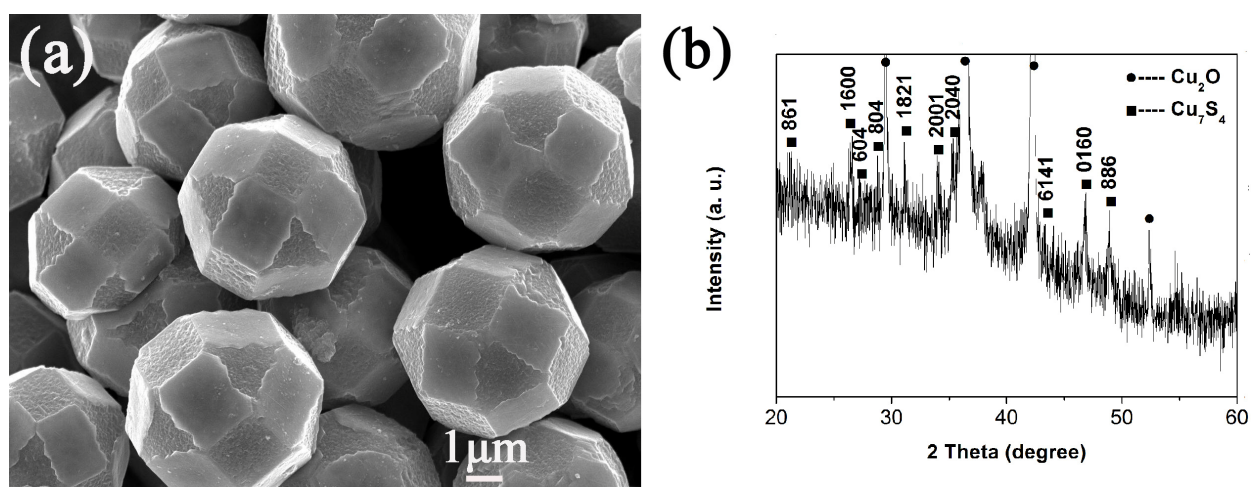

**Fig. S5.** (a) FESEM image of the polyhedral 26-facet  $\text{Cu}_2\text{O}@ \text{Cu}_7\text{S}_4$  core/shell architectures obtained in pure water system; (b) the corresponding XRD pattern.

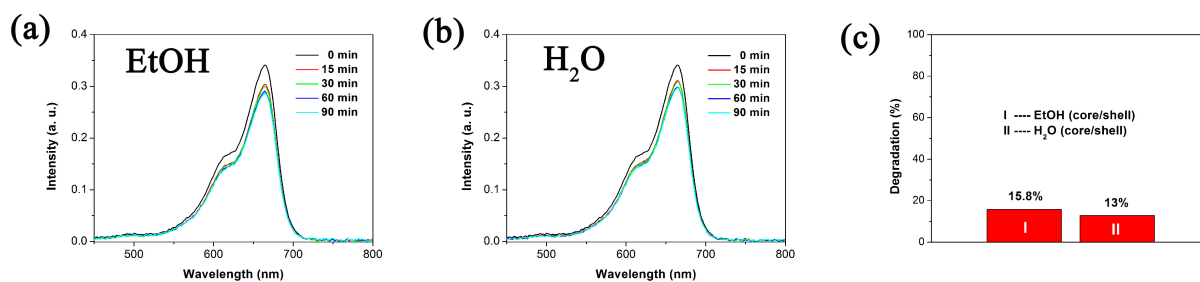

**Fig. S6** (a) Absorption spectra of a solution of MB solution in the presence of the Cu<sub>2</sub>O@Cu<sub>7</sub>S<sub>4</sub> core/shell architectures synthesized in anhydrous ethanol (EtOH) system; (b) Absorption spectra of a solution of MB solution in the presence of the Cu<sub>2</sub>O@Cu<sub>7</sub>S<sub>4</sub> core/shell architectures synthesized in pure water (H<sub>2</sub>O) system; (c) A plot of the extent of photodegradation of MB by different catalysts under natural light, Panel I: the Cu<sub>2</sub>O@Cu<sub>7</sub>S<sub>4</sub> core/shell architectures synthesized in anhydrous ethanol (EtOH) system, Panel II: the Cu<sub>2</sub>O@Cu<sub>7</sub>S<sub>4</sub> core/shell architectures synthesized in pure water (H<sub>2</sub>O) system.

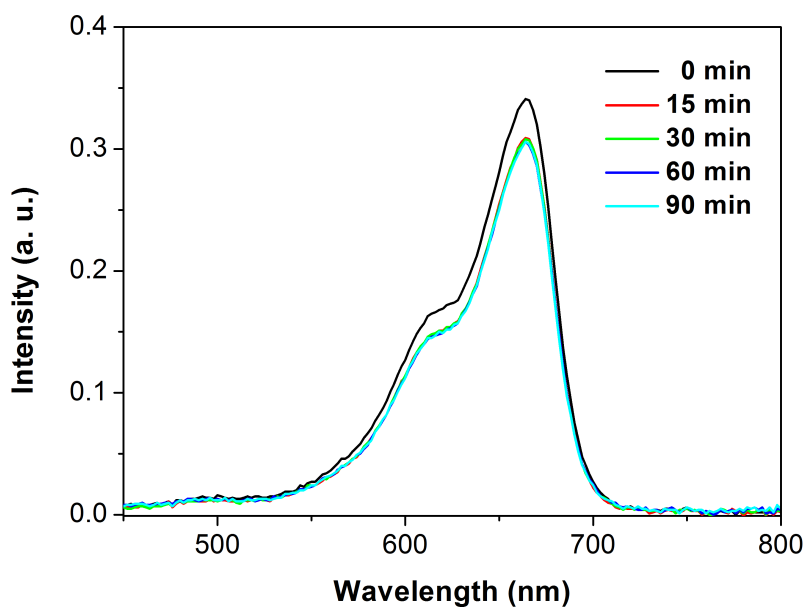

**Fig. S7** Absorption spectra of a solution of MB solution in the presence of the Cu<sub>7</sub>S<sub>4</sub> cages synthesized in anhydrous ethanol (EtOH) system without the aid of H<sub>2</sub>O<sub>2</sub> molecules.
